# Supplementary figures and images for: In Silico Genome-Wide Analysis of Respiratory Burst Oxidase Homolog (RBOH) Family Genes in Five Fruit-Producing Trees, and Potential Functional Analysis on Lignification of Stone Cells in Chinese White Pear
Source: MDPI journal article supplement (doi:10.3390/cells8060520), 2019-05-29

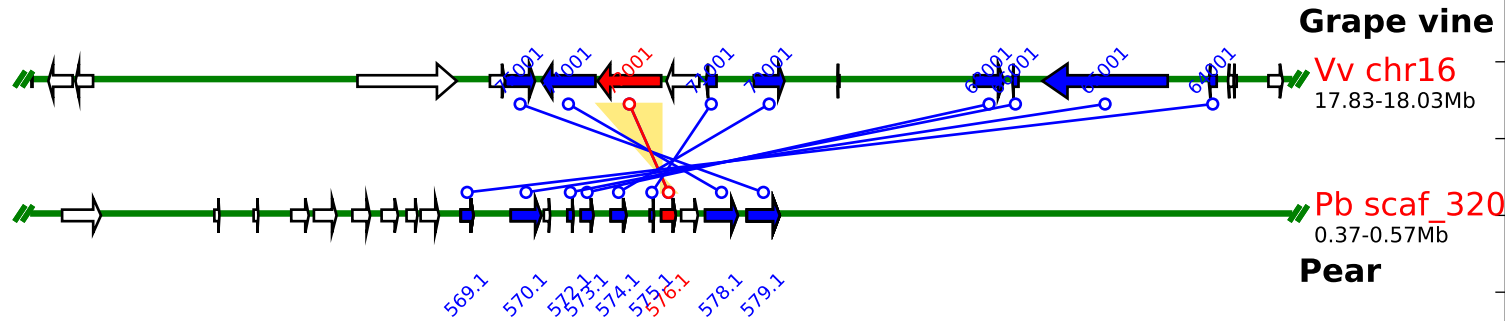

Supplement: s1 [file s1]

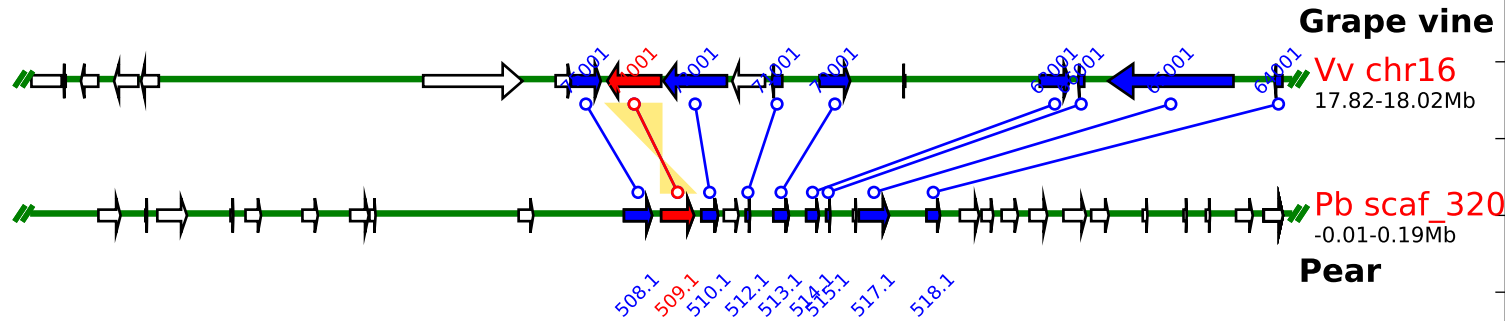

Supplement: s1 [file s1]

# Grape vine

Vv chr6  
4.67-4.87Mb

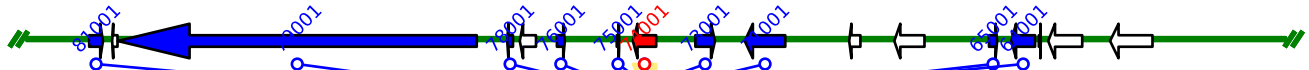

Pp sca6  
5.96-6.16Mb

# Peach

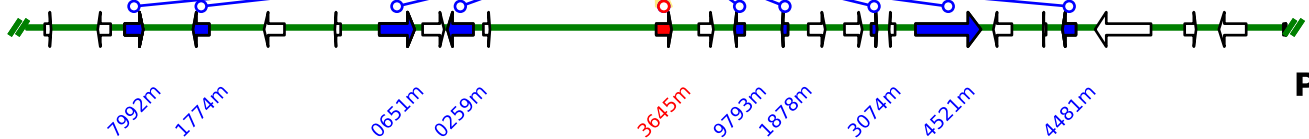

Supplement: s1 [file s1]

# Grape vine

Vv chr16  
17.82-18.02Mb

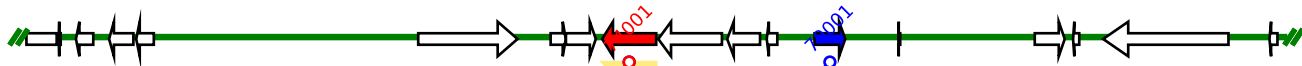

Ci scf\_0000  
2.08-2.28Mb

# Sweet oran

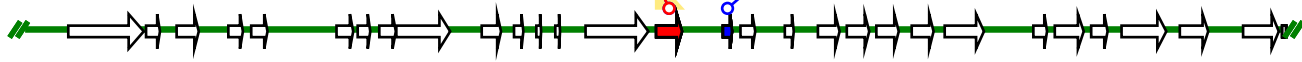

5553m  
3030m

Supplement: s1 [file s1]

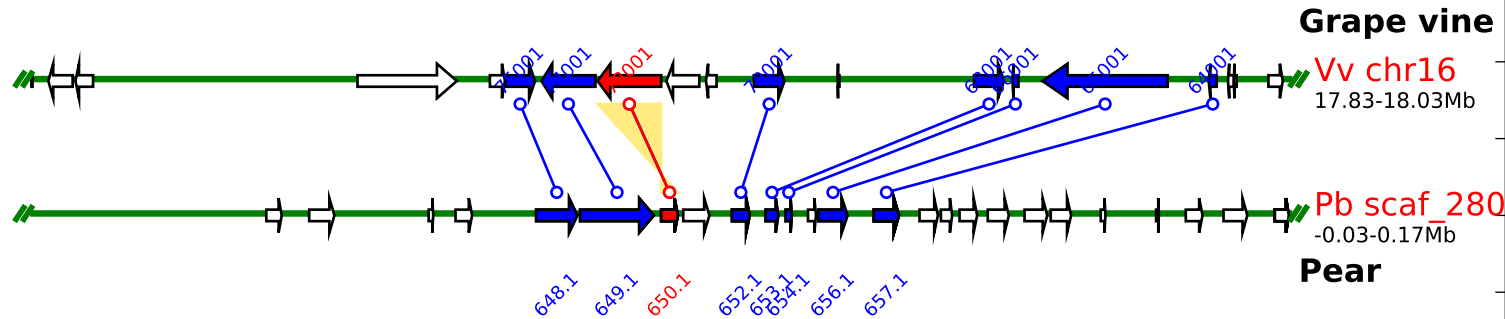

Supplement: s1 [file s1]

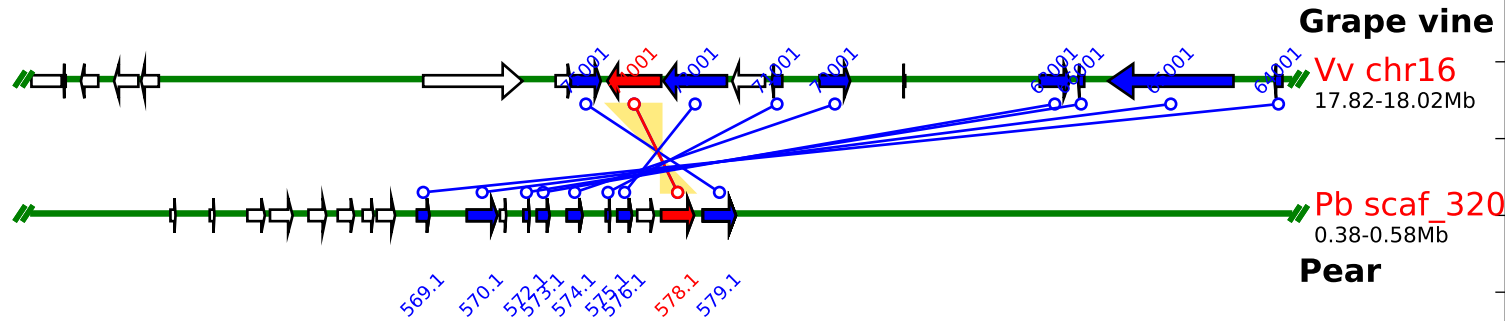

Supplement: s1 [file s1]

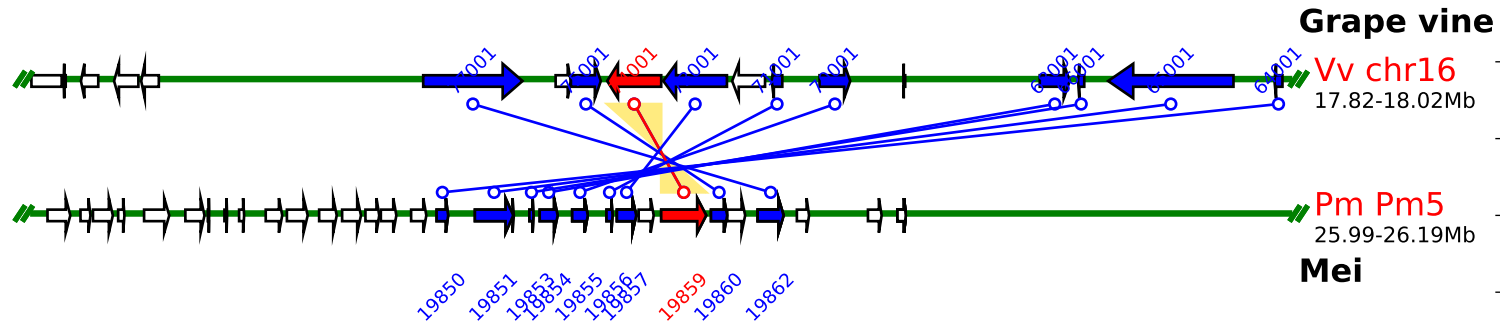

Supplement: s1 [file s1]

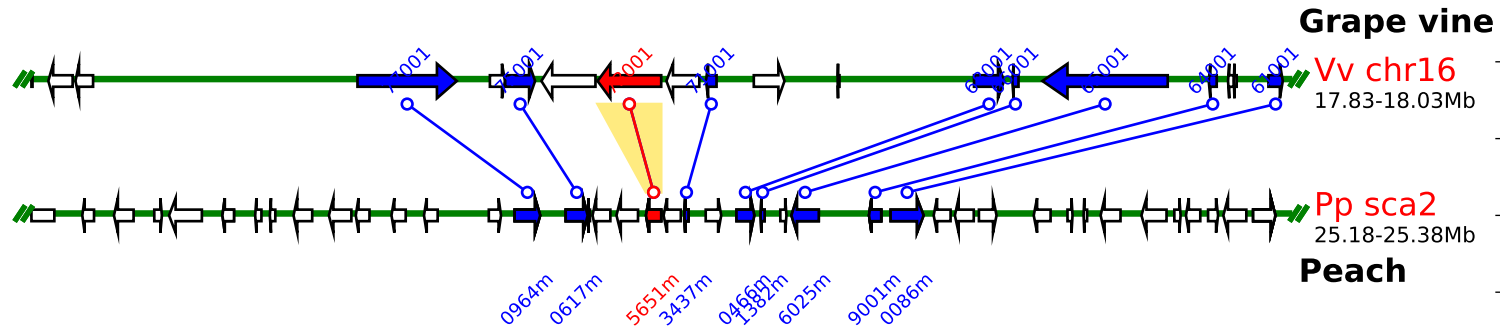

Supplement: s1 [file s1]

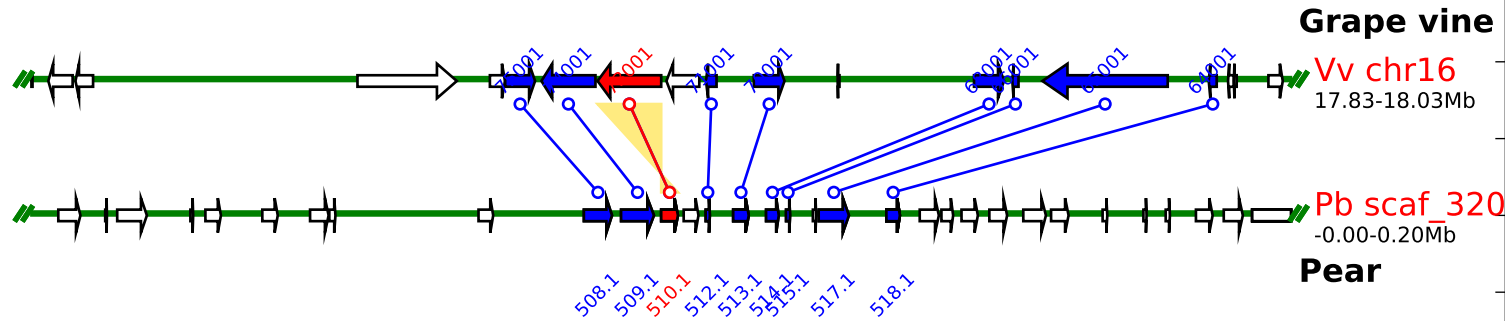

Supplement: s1 [file s1]

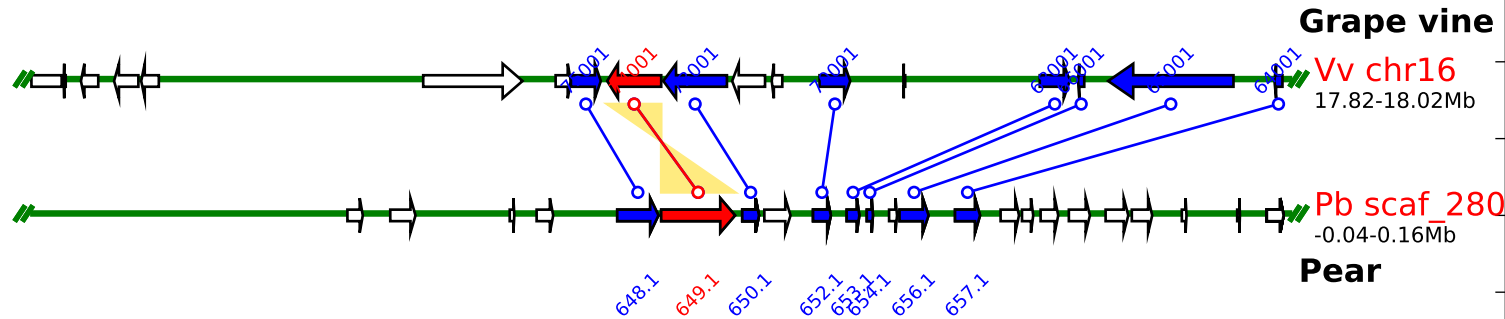

Supplement: s1 [file s1]

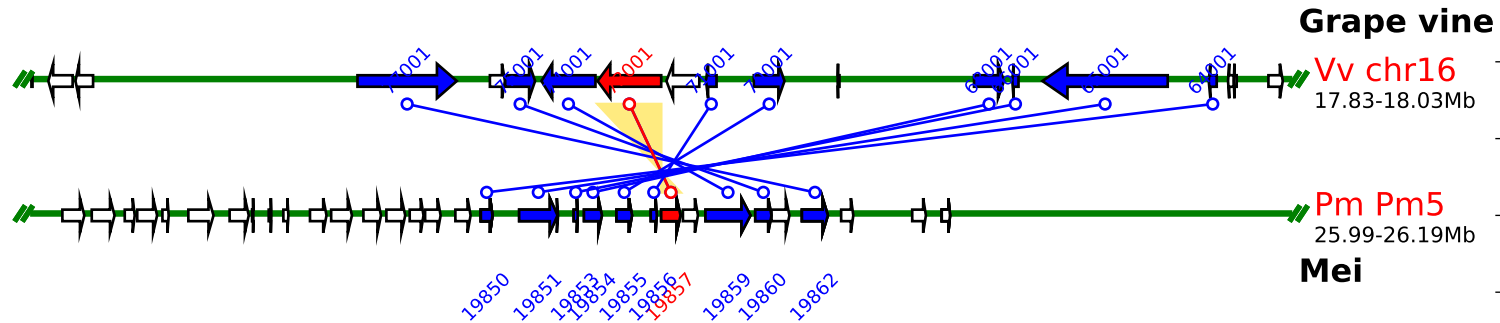

Supplement: s1 [file s1]

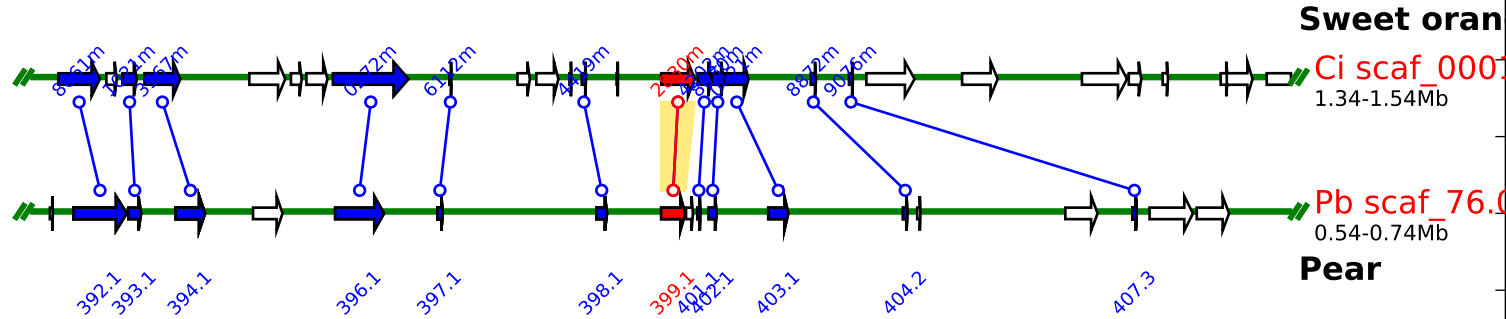

Supplement: s1 [file s1]

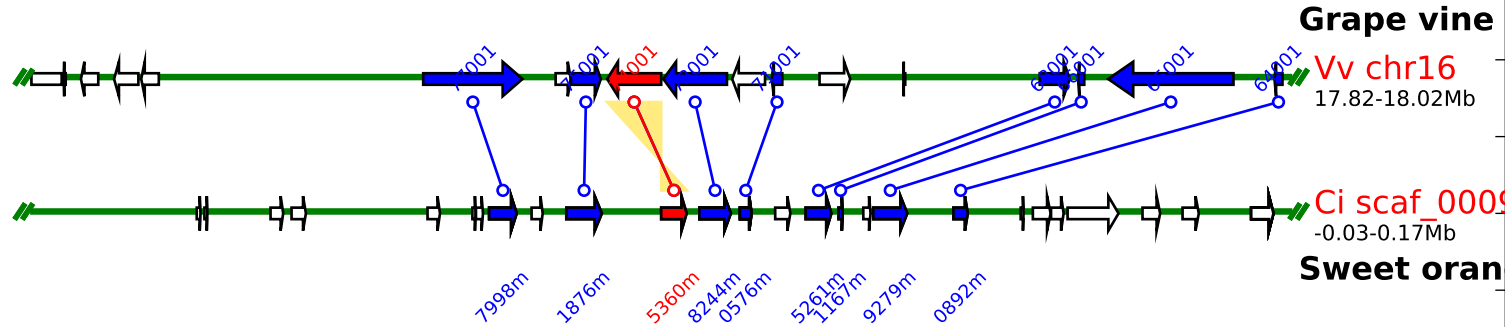

Supplement: s1 [file s1]

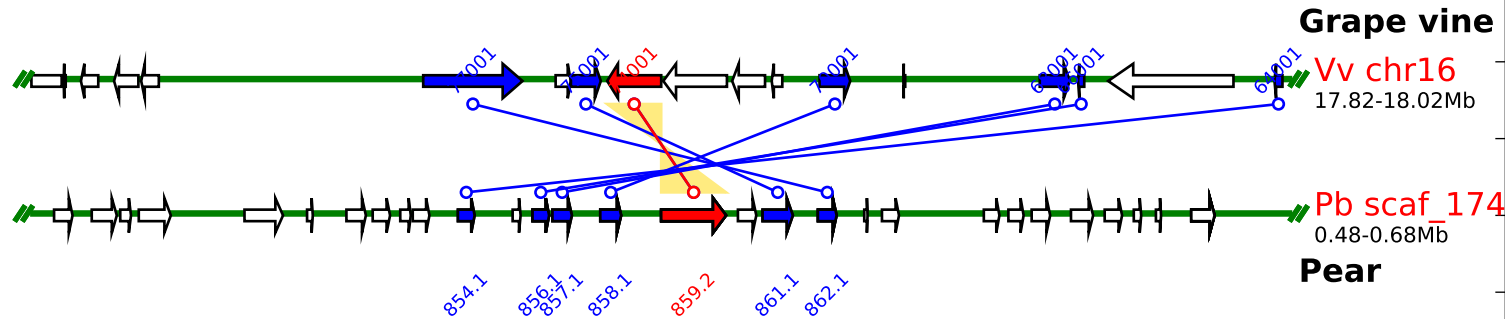

Supplement: s1 [file s1]

# Grape vine

Vv chr16  
17.82-18.02Mb

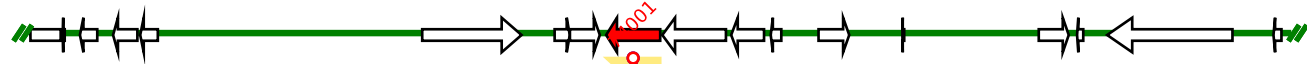

Pm Pm5  
17.00-17.20Mb

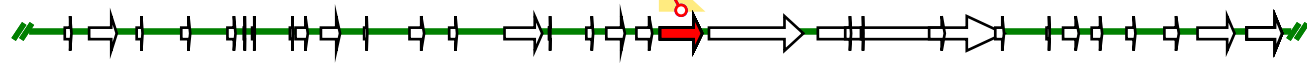

Mei

Supplement: s1 [file s1]

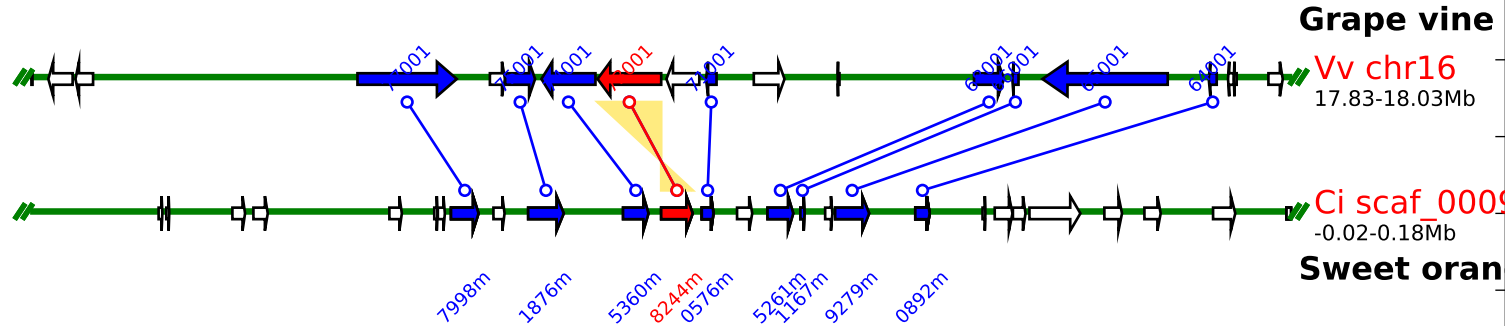

Supplement: s1 [file s1]

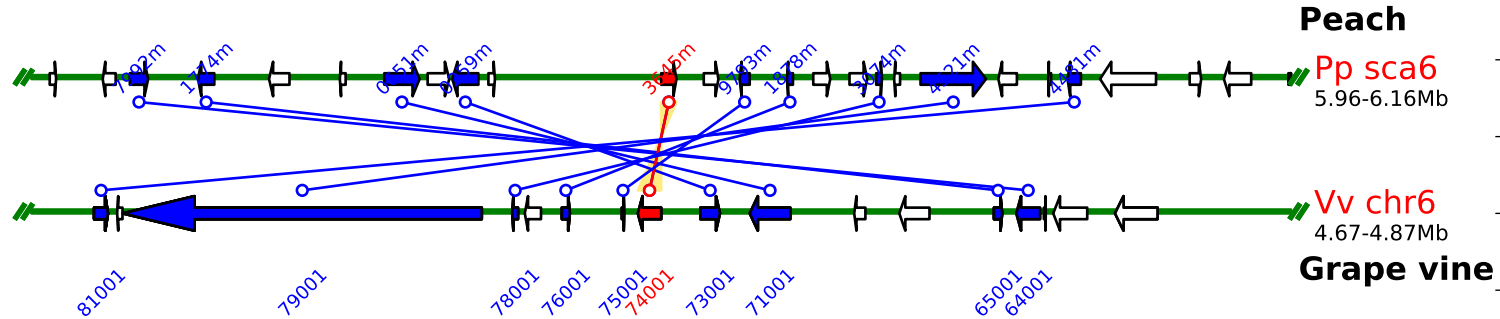

Supplement: s1 [file s1]

**Peach**

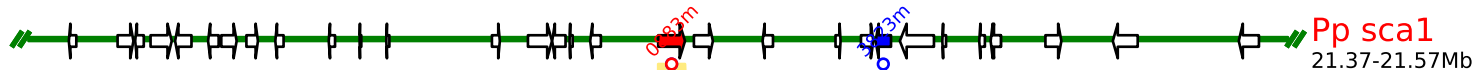

**Pp sca5**  
12.92-13.12Mb

**Peach**

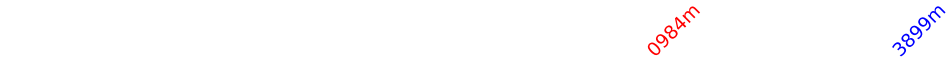

Supplement: s1 [file s1]
